# Supplementary material
Source: Springer Nature journal article supplement (https://www.springermedizin.de/resource/supplementary/13054_2009_8487_MOESM3_ESM.pdf/9732076)

**(a)**

Detection of an increase in Cltd  $\geq 15\%$   
with volume expansion

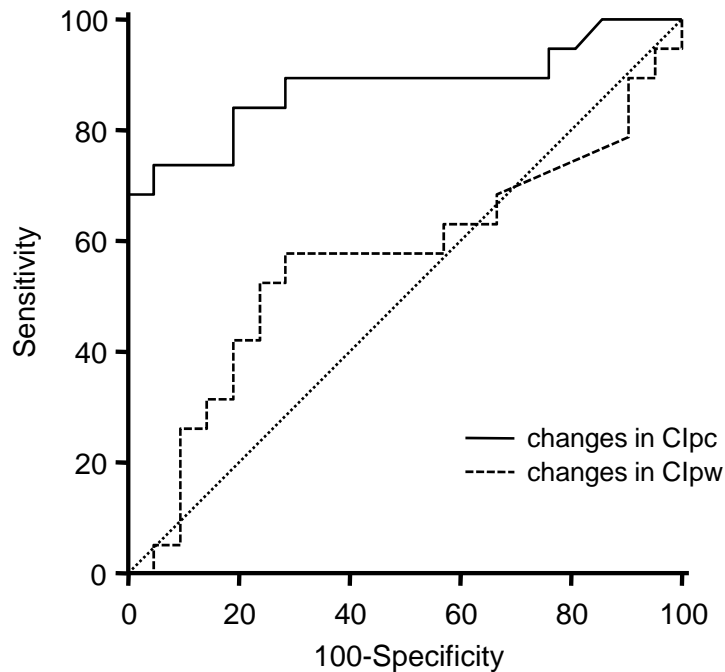**(b)**

Detection of an increase in Cltd  $\geq 15\%$   
with norepinephrine

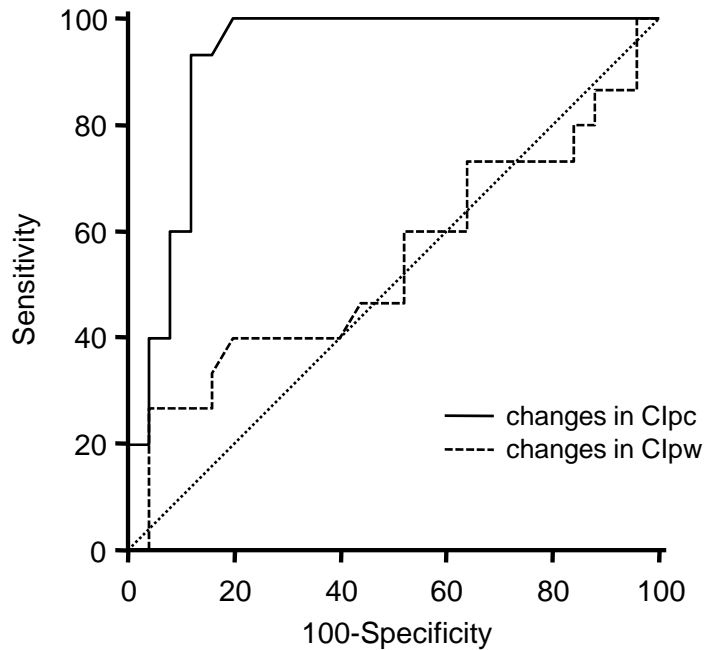

Supplement: MOESM3 [file 9732076]
